# Supplementary material for: NMR Study on Laccase Polymerization of Kraft Lignin Using Different Enzymes Source
Source: MDPI journal article supplement (doi:10.3390/ijms24032359), 2023-01-25
Supplement: s1 [file s1]

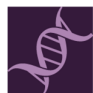

## Supplementary Material

# NMR Study on Laccase Polymerization of Eucalypt Kraft Lignin Using Different Enzymes Source

David Ibarra<sup>1\*</sup>, Luisa García-Fuentevilla<sup>1</sup>, Gabriela Domínguez<sup>2</sup>, Raquel Martín-Sampedro<sup>1</sup>, Manuel Hernández<sup>2</sup>, María E. Arias<sup>2</sup>, José, I. Santos<sup>3</sup>, María E. Eugenio<sup>1</sup>

<sup>1</sup> Forest Sciences Institute (ICIFOR-INIA), CSIC, Ctra. de la Coruña Km 7.5, 28040 Madrid, Spain; ibarra.david@inia.csic.es (D.I.); [luisa.garcia@inia.csic.es](mailto:luisa.garcia@inia.csic.es) (L.G.-F.); [raquel.martin@inia.csic.es](mailto:raquel.martin@inia.csic.es) (R.M.-S.); [mariaeugenio@inia.csic.es](mailto:mariaeugenio@inia.csic.es) (M.E.E.)

<sup>2</sup> Department of Biomedicine and Biotechnology. University of Alcalá. 28805 Alcalá de Henares, Madrid, Spain; [gabriela.dominguez@edu.uah.es](mailto:gabriela.dominguez@edu.uah.es) (G.D.); [manuel.hernandez@uah.es](mailto:manuel.hernandez@uah.es) (M.H.); [enriqueta.arias@uah.es](mailto:enriqueta.arias@uah.es) (M.E.A.)

<sup>3</sup> General Services of Research SGIKER, University of the Basque Country (UPV/EHU), Edificio Joxe Mari Korta Avda. Tolosa 72, Donostia-San Sebastian 20018, Spain; [joseignacio.santosg@ehu.eus](mailto:joseignacio.santosg@ehu.eus) (J.I.S.)

\* Correspondence: [ibarra.david@inia.csic.es](mailto:ibarra.david@inia.csic.es); Tel.: +34-913473948

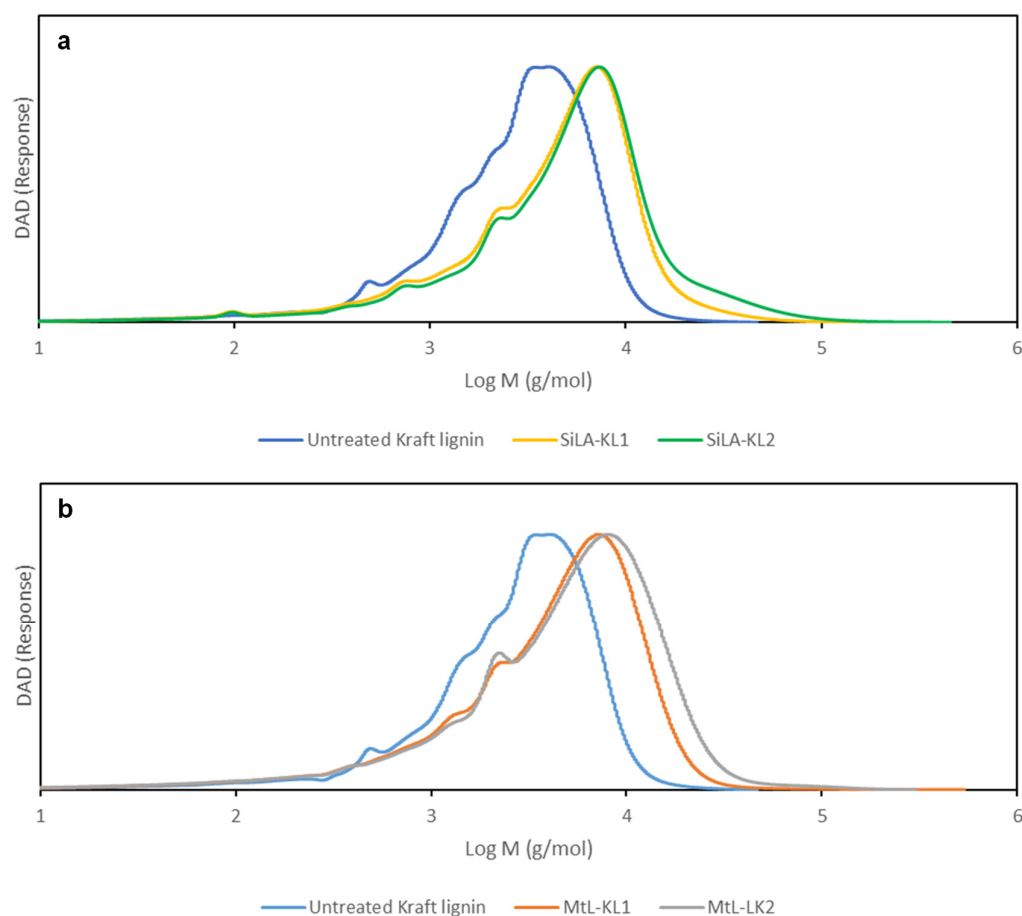

**Figure S1.** Molecular weight distributions of untreated Kraft lignin and the resulting treated lignins with SiLA (a) and MtL (b) laccases. SiLA-KL1 and MtL-KL1, 40 IU/g lignin and 90 min; SiLA-KL2 and MtL-KL2, 100 IU/g lignin and 240 min.

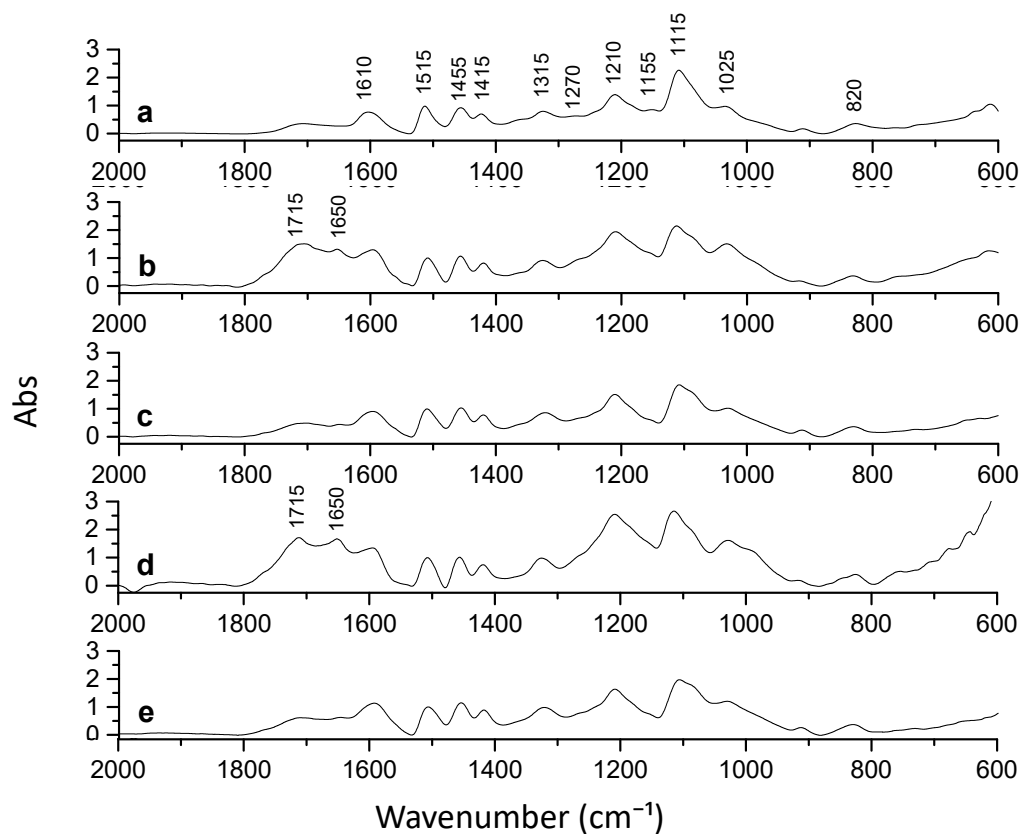

**Figure S2.** FTIR spectra, 2000-600 cm<sup>-1</sup> region of untreated Kraft lignin (a) and the resulting treated lignins with SiLA (b, 40 IU/g lignin and 90 min, SiLA-KL1; d, 100 IU/g lignin and 240 min, SiLA-KL2) and MtL (c, 40 IU/g lignin and 90 min, MtL-KL1; e, 100 IU/g lignin and 240 min, MtL-KL2) laccases. The bands in each spectra are normalized with regard to the band at 1515 cm<sup>-1</sup>.

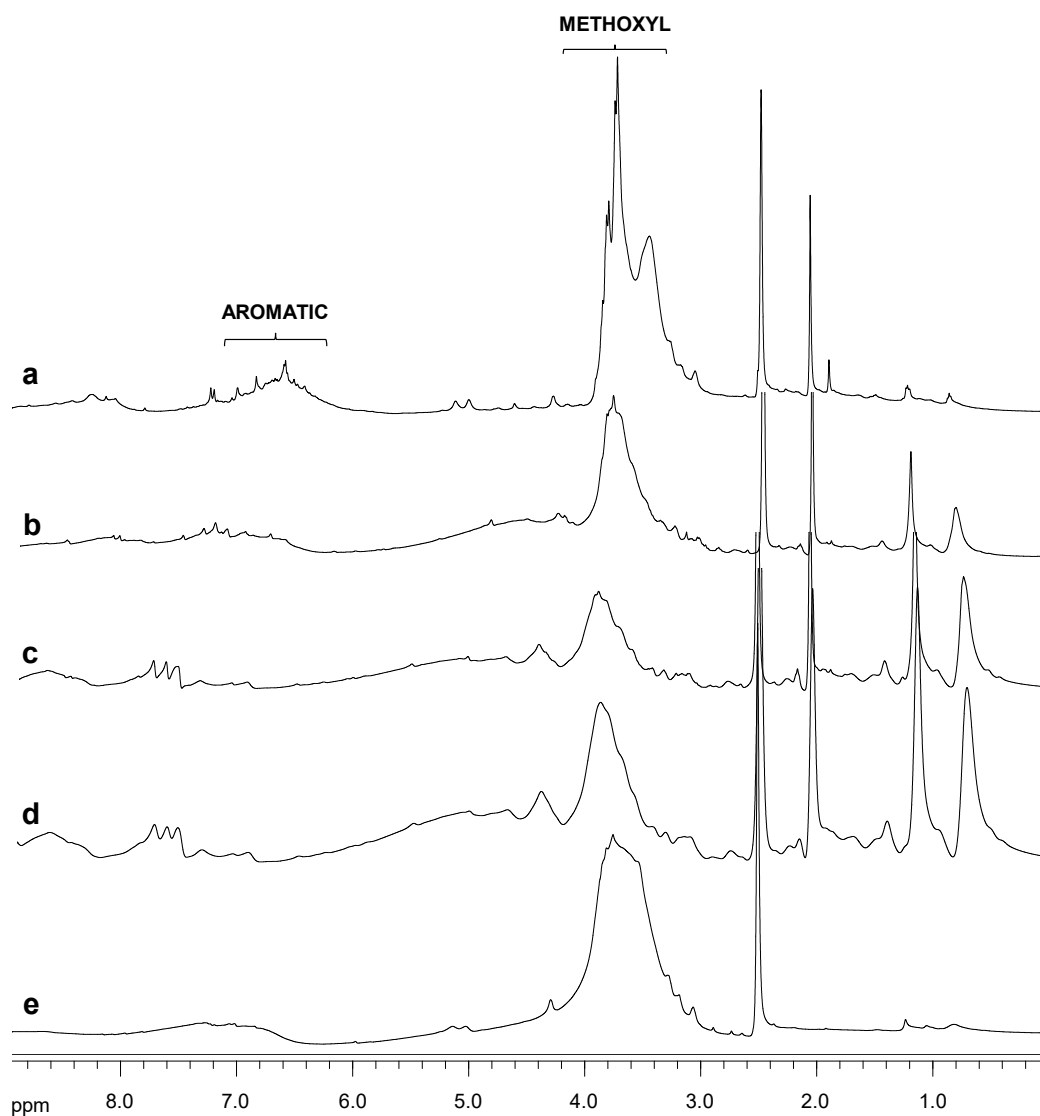

**Figure S3.** <sup>1</sup>H NMR spectra,  $\delta_H$  0.0–9.0 ppm, of untreated Kraft lignin (a) and the resulting treated lignins with SiLA (b, SiLA-KL1; d, SiLA-KL2) and MtL (c, MtL-KL1; e, MtL-KL2) laccases.

**Table S1.** Assignment of main lignin and carbohydrates  $^{13}\text{C}$ – $^1\text{H}$  correlation signals in the HSQC spectra of untreated Kraft lignin and the resulting treated lignins with MtL and SiLA laccases.

| $\delta_{\text{C}}/\delta_{\text{H}}$ (ppm) | Assignment                                                                                                                                                   |
|---------------------------------------------|--------------------------------------------------------------------------------------------------------------------------------------------------------------|
| 48.8/3.18                                   | $\text{C}_{\beta}$ – $\text{H}_{\beta}$ , diarsinol substructures ( <b>B''</b> )                                                                             |
| 49.7/3.34                                   | $\text{C}_{\beta}$ – $\text{H}_{\beta}$ , epiesinol substructures ( <b>B'</b> )                                                                              |
| 51.8/3.4                                    | $\text{C}_{\alpha}$ – $\text{H}_{\alpha}$ , $\alpha$ -5' condensed substructure ( <b>C</b> )                                                                 |
| 54.0/2.80                                   | $\text{C}_{\beta}$ – $\text{H}_{\beta}$ , epiesinol substructures ( <b>B'</b> )                                                                              |
| 53.8/3.04                                   | $\text{C}_{\beta}$ – $\text{H}_{\beta}$ , resinol substructures ( <b>B</b> )                                                                                 |
| 56.0/3.71                                   | $\text{C}$ – $\text{H}$ , methoxyls ( <b>MeO</b> )                                                                                                           |
| 60.6/3.40–3.64                              | $\text{C}_{\gamma}$ – $\text{H}_{\gamma}$ , $\beta$ -O-4' substructures ( <b>A</b> )                                                                         |
| 61.8/4.11                                   | $\text{C}_{\gamma}$ – $\text{H}_{\gamma}$ , cinnamyl alcohol end groups ( <b>I</b> )                                                                         |
| 63.4/3.23–3.87                              | $\text{C}_5$ – $\text{H}_5$ , xylan                                                                                                                          |
| 63.6/3.10                                   | $\text{C}_{\gamma}$ – $\text{H}_{\gamma}$ , aryl-glycerol ( <b>AG</b> )                                                                                      |
| 69.3/3.30–3.70                              | $\text{C}_{\gamma}$ – $\text{H}_{\gamma}$ , epiesinol substructures ( <b>B'</b> )                                                                            |
| 70.1/3.73–4.10                              | $\text{C}_{\gamma}$ – $\text{H}_{\gamma}$ , epiesinol substructures ( <b>B'</b> )                                                                            |
| 71.4/3.77–4.16                              | $\text{C}_{\gamma}$ – $\text{H}_{\gamma}$ , resinol substructures ( <b>B</b> )                                                                               |
| 72.3/4.87                                   | $\text{C}_{\alpha}$ – $\text{H}_{\alpha}$ , $\beta$ -O-4' S unit ( <b>A</b> )                                                                                |
| 73.0/3.07                                   | $\text{C}_2$ – $\text{H}_2$ , xylan                                                                                                                          |
| 74.0/4.41                                   | $\text{C}_{\alpha}$ – $\text{H}_{\alpha}$ , aryl-glycerol ( <b>AG</b> )                                                                                      |
| 74.3/3.31                                   | $\text{C}_3$ – $\text{H}_3$ , xylan                                                                                                                          |
| 74.3/4.43                                   | $\text{C}_{\alpha}$ – $\text{H}_{\alpha}$ , Ar–CHOH–COOH units ( <b>F</b> )                                                                                  |
| 75.6/3.47                                   | $\text{C}_{\alpha}$ – $\text{H}_{\alpha}$ aryl-glycerol ( <b>AG</b> )                                                                                        |
| 75.9/3.51                                   | $\text{C}_4$ – $\text{H}_4$ , xylan                                                                                                                          |
| 81.6/4.75                                   | $\text{C}_{\alpha}$ – $\text{H}_{\alpha}$ , spirodienone substructures ( <b>E</b> )                                                                          |
| 81.8/4.76                                   | $\text{C}_{\alpha}$ – $\text{H}_{\alpha}$ , epiesinol substructures ( <b>B'</b> )                                                                            |
| 85.5/4.76                                   | $\text{C}_{\alpha'}$ – $\text{H}_{\alpha'}$ , spirodienone substructures ( <b>E</b> )                                                                        |
| 85.4/4.62                                   | $\text{C}_{\alpha}$ – $\text{H}_{\alpha}$ , resinol substructures ( <b>B</b> )                                                                               |
| 87.6/4.31                                   | $\text{C}_{\alpha}$ – $\text{H}_{\alpha}$ , epiesinol substructures ( <b>B'</b> )                                                                            |
| 101.9/4.30                                  | $\text{C}$ -1, (1-4) $\beta$ -D-Xylp                                                                                                                         |
| 104.1/6.60                                  | $\text{C}_{2,6}$ – $\text{H}_{2,6}$ , S units ( <b>S</b> )                                                                                                   |
| 103.9/6.82                                  | $\text{C}_{2,6}$ – $\text{H}_{2,6}$ , 3,5-tetramethoxy- <i>para</i> -diphenol substructures ( <b>S</b> <sub>1,1'</sub> )                                     |
| 105.0/6.9                                   | $\text{C}_{2,6}$ – $\text{H}_{2,6}$ , <b>S</b> <sub>1</sub> – <b>G</b> <sub>1'</sub> / <b>G</b> <sub>5'</sub> substructures                                  |
| 107.0/7.30                                  | $\text{C}_{2,6}$ – $\text{H}_{2,6}$ , oxidized ( $\text{H}$ – $\text{C}_{\alpha}$ =O or $\text{H}_3\text{C}$ – $\text{C}_{\alpha}$ =O) S units ( <b>S'</b> ) |
| 110.8/6.90                                  | $\text{C}_2$ – $\text{H}_2$ , G units ( <b>G</b> )                                                                                                           |
| 111.3/7.37                                  | $\text{C}_2$ – $\text{H}_2$ , oxidized ( $\text{H}$ – $\text{C}_{\alpha}$ =O) G units ( <b>G'</b> )                                                          |
| 115.0/6.72                                  | $\text{C}_{3,5}$ – $\text{H}_{3,5}$ , <i>p</i> -hydroxyphenyl ( <b>H</b> )                                                                                   |
| 115.1/6.40–6.80                             | $\text{C}_5$ – $\text{H}_5$ , G units ( <b>G</b> )                                                                                                           |
| 119.6/6.76                                  | $\text{C}_6$ – $\text{H}_6$ , G units ( <b>G</b> )                                                                                                           |
| 119.7/6.95                                  | $\text{C}_6$ – $\text{H}_6$ , 3-dimethoxy- <i>para</i> -diphenol substructures ( <b>G</b> <sub>1,1'</sub> )                                                  |
| 120.3/7.23                                  | $\text{C}_{\beta}$ – $\text{H}_{\beta}$ , stilbene ( <b>SB</b> <sub>5<math>\beta</math></sub> )                                                              |
| 123.4/7.50                                  | $\text{C}_6$ – $\text{H}_6$ , oxidized ( $\text{H}_3\text{C}$ – $\text{C}_{\alpha}$ =O) G units ( <b>G''</b> )                                               |
| 126.4/6.95                                  | $\text{C}_{\alpha}$ – $\text{H}_{\alpha}$ , stilbene ( <b>SB</b> <sub>1<math>\alpha</math></sub> )                                                           |
| 126.8/7.40                                  | $\text{C}_6$ – $\text{H}_6$ , oxidized ( $\text{H}$ – $\text{C}_{\alpha}$ =O) G units ( <b>G'</b> )                                                          |
